# Supplementary material for: Highly efficient cobalt catalysts promoted by CeO2–Al2O3 for ammonia decomposition
Source: Royal Society of Chemistry journal article supplement (doi:10.1039/d4cy00835a), 2024-01-01
Supplement: d4cy00835a1.pdf [file d4cy00835a1.pdf]

Electronic supporting Information

**Highly efficient cobalt catalysts promoted by CeO<sub>2</sub>-Al<sub>2</sub>O<sub>3</sub> for ammonia  
decomposition**

Kai Xu,<sup>† a, b</sup> Na Jiang,<sup>† b</sup> Peng Wang,<sup>a</sup> Wei-Wei Wang,<sup>\* b</sup> Chun-jiang Jia<sup>\* b</sup>

<sup>a</sup>State Key Laboratory of Crystal Materials, Shandong University, Jinan 250100, China.

<sup>b</sup>Key Laboratory for Colloid and Interface Chemistry, Key Laboratory of Special Aggregated Materials, School of Chemistry and Chemical Engineering, Shandong University, Jinan 250100, China.

<sup>†</sup> These authors contributed equally: Kai Xu, Na Jiang.

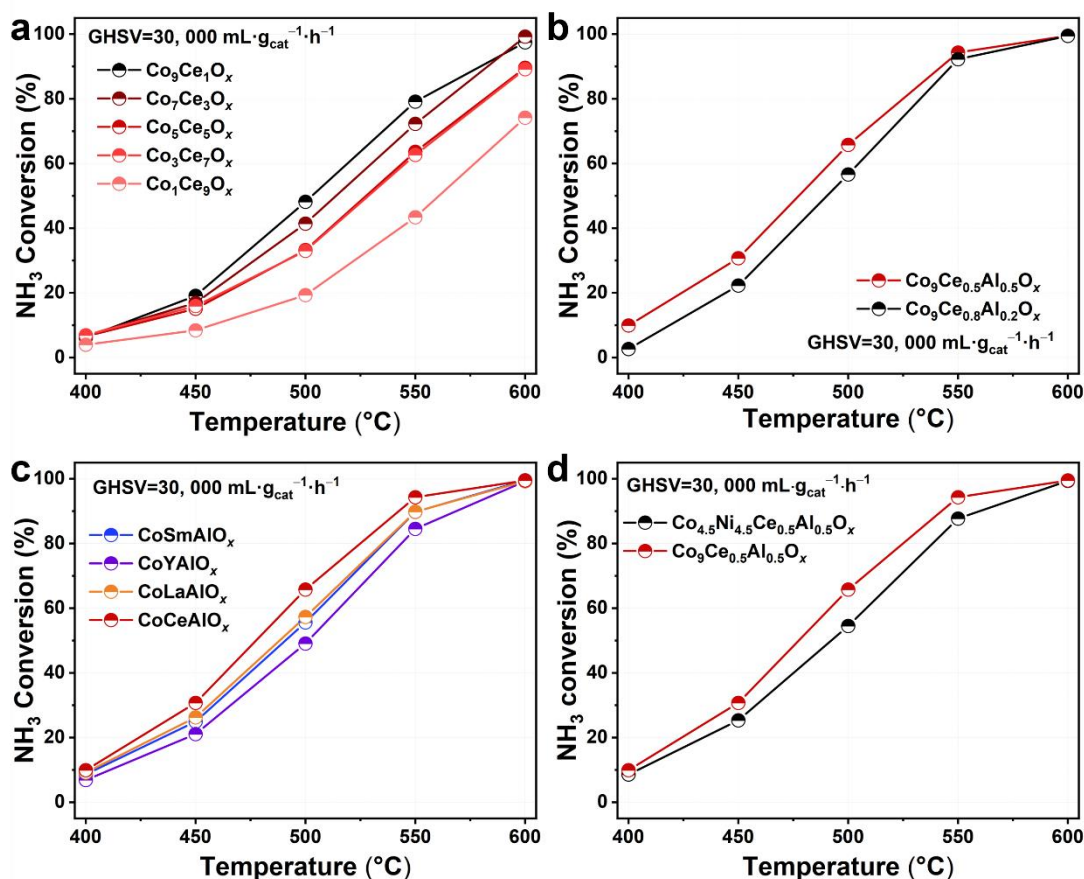

**Fig. S1** Temperature-dependent activities of the Co-based catalysts. (a) CoCeO<sub>x</sub> catalysts with different Co/Ce ratio; (b) CoCeAlO<sub>x</sub> catalysts with different Ce/Al ratio; (c) Co<sub>9</sub>RE<sub>0.5</sub>Al<sub>0.5</sub>O<sub>x</sub> catalysts with different rare earth elements (Sm, Y, La, Ce); (d) Co<sub>4.5</sub>Ni<sub>4.5</sub>Ce<sub>0.5</sub>Al<sub>0.5</sub>O<sub>x</sub> and Co<sub>9</sub>Ce<sub>0.5</sub>Al<sub>0.5</sub>O<sub>x</sub>

To investigate the impact of component concentrations on the ammonia decomposition reaction, we assessed the reactivity of the catalysts with different mole ratios of Co, Ce and Al element. As the ratio of Co:Ce decreased (Fig. S1a), a pronounced decline in activity of the Co<sub>a</sub>Ce<sub>b</sub>O<sub>x</sub> catalysts occurred. Therefore, it inferred that cobalt species was the main active species for ammonia decomposition, whilst ceria acted as an assisting promoter. From Fig. S1b, it could be observed that the second round NH<sub>3</sub> conversion of Co<sub>9</sub>Ce<sub>0.8</sub>Al<sub>0.2</sub>O<sub>x</sub> decreased by approximately 9% as the mole ratio reduced from 0.5 to 0.2. This indicated the vital role of alumina in preserving stability of activity. Additionally, the catalysts obtained by replacing Ce with other rare earth elements delivered inferior activity compared to CoCeAlO<sub>x</sub>, demonstrating the unique advantages of Ce for applying in ammonia decomposition reaction (Fig. S1c). And Co<sub>4.5</sub>Ni<sub>4.5</sub>Ce<sub>0.5</sub>Al<sub>0.5</sub>O<sub>x</sub> showed lower activity than Co<sub>9</sub>Ce<sub>0.5</sub>Al<sub>0.5</sub>O<sub>x</sub> (Fig. S1d).

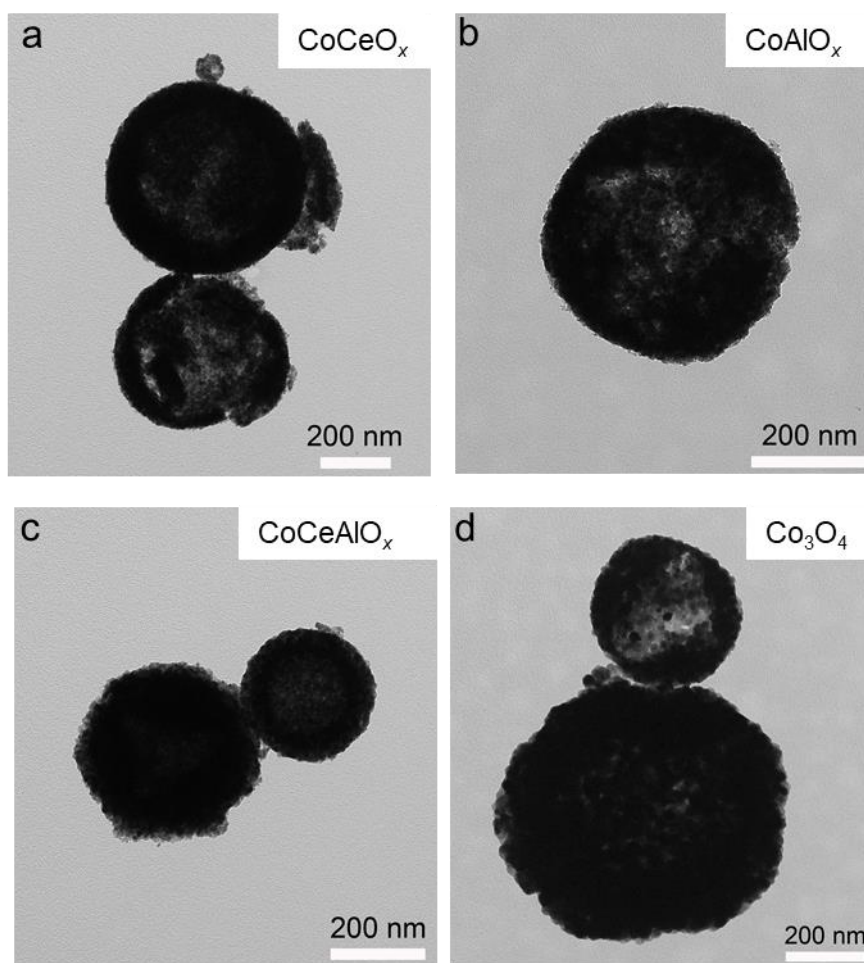

**Fig. S2** TEM images of the as-prepared samples. (a)  $\text{CoCeO}_x$ ; (b)  $\text{CoAlO}_x$ ; (c)  $\text{CoCeAlO}_x$ ; (d)  $\text{Co}_3\text{O}_4$

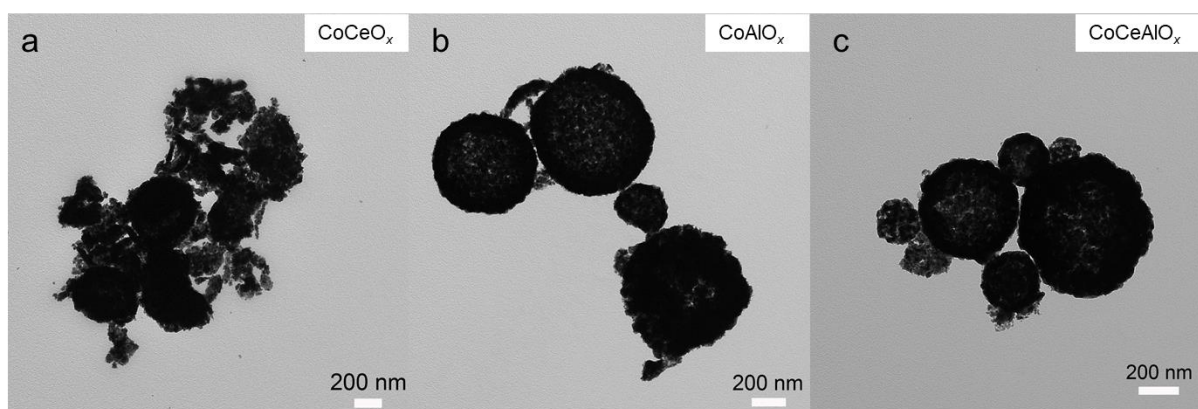

**Fig. S3** TEM images of the used samples. (a)  $\text{CoCeO}_x$ ; (b)  $\text{CoAlO}_x$ ; (c)  $\text{CoCeAlO}_x$

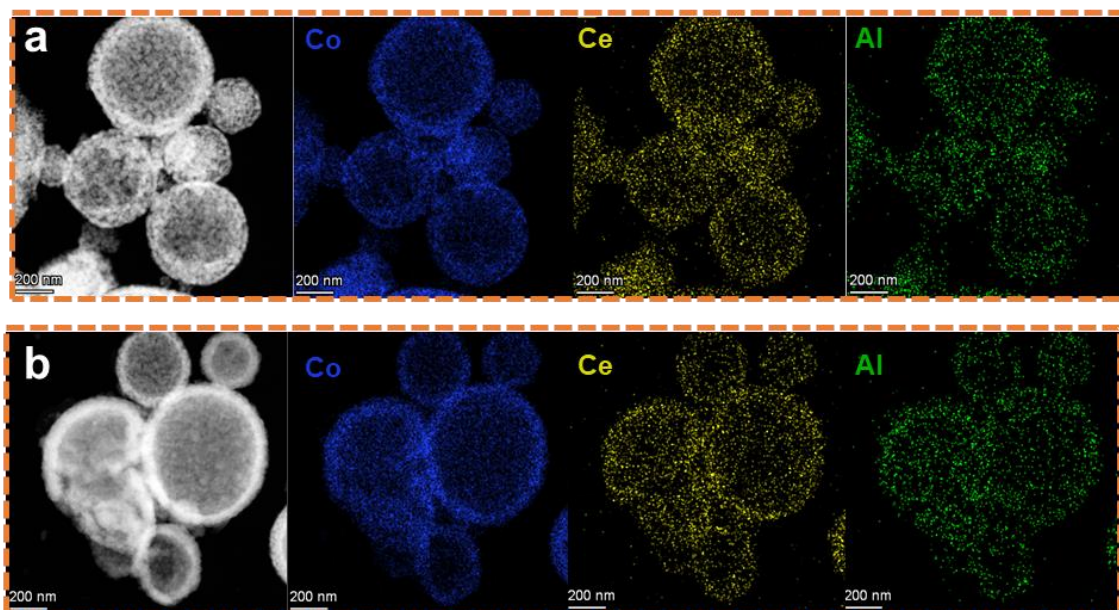

**Fig. S4** The EDS elemental mappings of the CoCeAlO<sub>x</sub> sample after long-term stability tests

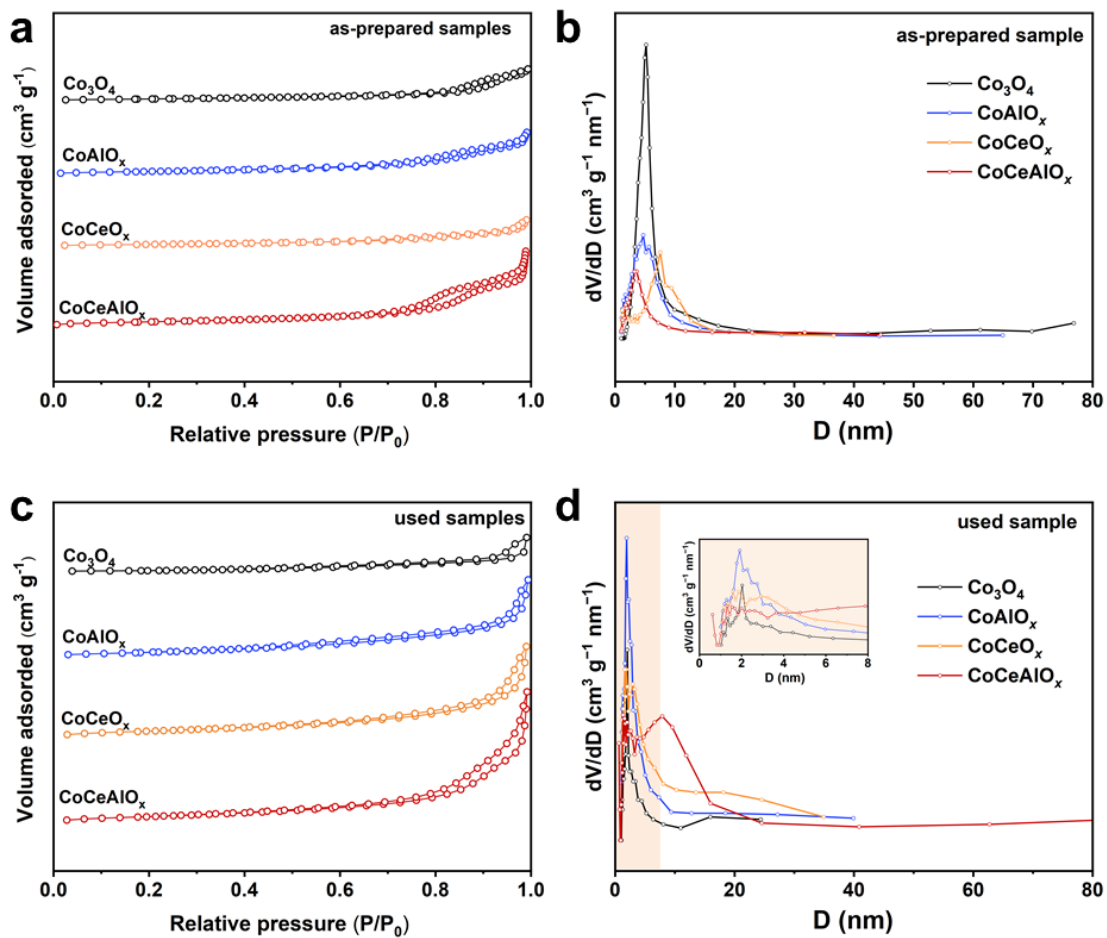

**Fig. S5** The physical properties of the catalysts. (a, c) The N<sub>2</sub> adsorption-desorption isotherms of the as-prepared (a) and used (c) samples; (b, d) BJH pore size distributions of the as-prepared (b) and used (d) samples

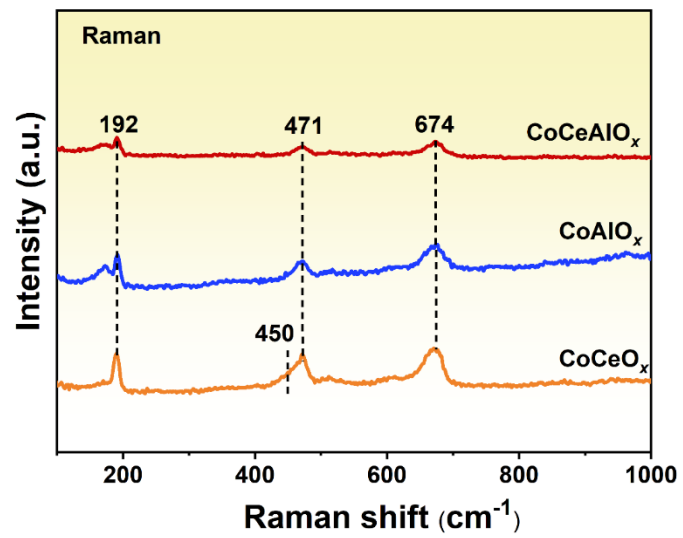

**Fig.S6** The Raman spectra of the samples after long-term stability tests

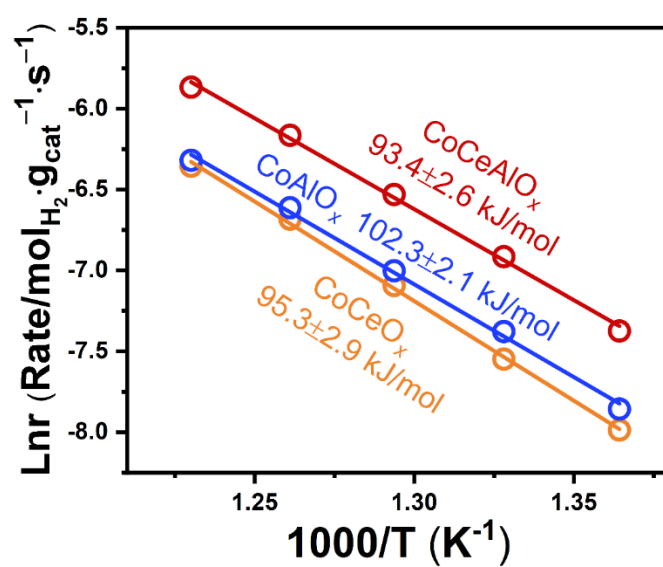

**Fig.S7** Arrhenius plots for the catalysts ( $\text{CoCeAlO}_x$ ,  $\text{CoCeO}_x$  and  $\text{CoAlO}_x$ ) in the kinetic range

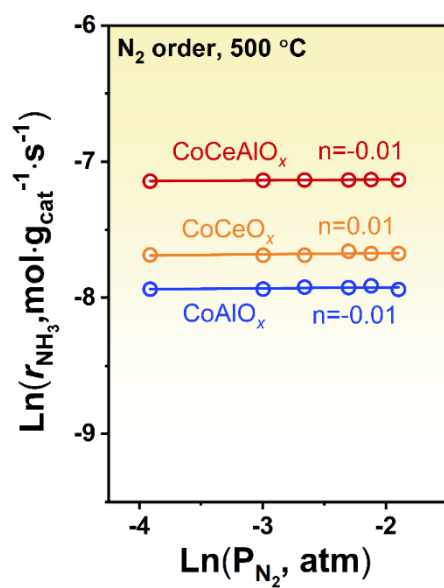

**Fig. S8** The Reaction orders of the N<sub>2</sub> for CoCeAlO<sub>x</sub>, CoCeO<sub>x</sub> and CoAlO<sub>x</sub>

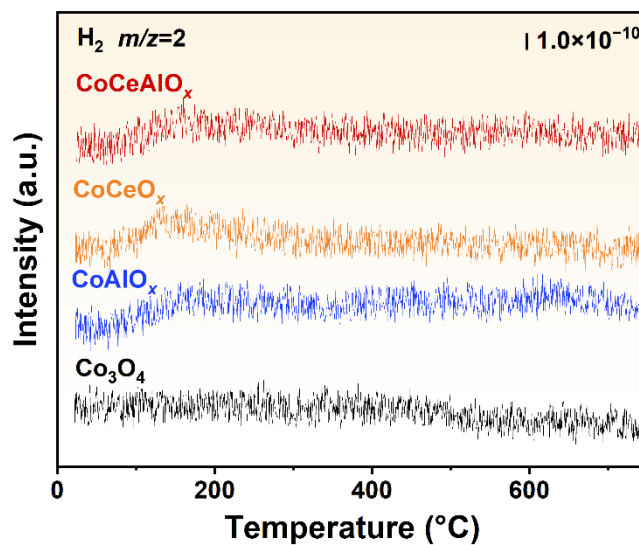

**Fig. S9** The desorption signals of  $\text{H}_2$  ( $m/z=2$ ) in  $\text{NH}_3$ -TPD over  $\text{CoCeAlO}_x$ ,  $\text{CoCeO}_x$ ,  $\text{CoAlO}_x$  and  $\text{Co}_3\text{O}_4$  catalysts.

The  $\text{H}_2$  signal of all related samples was shown in Fig. S9. It exhibited poor data quality, causing no efficient information could be obtained. The greater capacity of  $\text{CoCeAlO}_x$  for the suppression of hydrogen poisoning could be clearly concluded by the reaction order of  $\text{H}_2$  (Fig. 7b).

**Table S1** The ICP-AES results of various samples.

| Samples              | Co loading (wt%) | Ce loading (wt%) | Al loading (wt%) |
|----------------------|------------------|------------------|------------------|
| CoCeAlO <sub>x</sub> | 60.0             | 7.4              | 2.4              |
| CoCeO <sub>x</sub>   | 58.1             | 13.1             | —                |
| CoAlO <sub>x</sub>   | 66.6             | —                | 5.8              |

**Table S2** Physical properties of the as-prepared samples.

| Catalysts                      | Surface area (m <sup>2</sup> g <sup>-1</sup> ) <sup>a</sup> | Size of Co <sub>3</sub> O <sub>4</sub> (nm) <sup>b</sup> | Size of CeO <sub>2</sub> (nm) <sup>b</sup> |
|--------------------------------|-------------------------------------------------------------|----------------------------------------------------------|--------------------------------------------|
| CoCeAlO <sub>x</sub>           | 119.4                                                       | 8.7                                                      | \                                          |
| CoAlO <sub>x</sub>             | 83.3                                                        | 15.2                                                     | \                                          |
| CoCeO <sub>x</sub>             | 54.0                                                        | 9.6                                                      | 5.4                                        |
| Co <sub>3</sub> O <sub>4</sub> | 46.6                                                        | 17.1                                                     | \                                          |

<sup>a</sup> Measured by N<sub>2</sub> adsorption-desorption experiments.

<sup>b</sup> Evaluated by XRD results using Debye-Scherrer equation.

**Table S3** Physical properties of the used samples.

| Catalysts                      | Surface area (m <sup>2</sup> g <sup>-1</sup> ) <sup>a</sup> | Size of Co (nm) <sup>b</sup> | Size of CeO <sub>2</sub> (nm) <sup>b</sup> |
|--------------------------------|-------------------------------------------------------------|------------------------------|--------------------------------------------|
| CoCeAlO <sub>x</sub>           | 40.1                                                        | 10.3                         | \                                          |
| CoAlO <sub>x</sub>             | 30.0                                                        | 15.3                         | \                                          |
| CoCeO <sub>x</sub>             | 38.2                                                        | 21.2                         | 9.1                                        |
| Co <sub>3</sub> O <sub>4</sub> | 5.7                                                         | 32.0                         | \                                          |

<sup>a</sup> Measured by N<sub>2</sub> adsorption-desorption experiments.

<sup>b</sup> Evaluated by XRD results using Debye-Scherrer equation.

**Table S4** The peak center of different Co species ( $\text{Co}^{3+}$ ,  $\text{Co}^{2+}$ ,  $\text{Co}^0$ ) in XPS.

| Samples            | Binding Energy (eV) |                  |               |
|--------------------|---------------------|------------------|---------------|
|                    | $\text{Co}^{3+}$    | $\text{Co}^{2+}$ | $\text{Co}^0$ |
| $\text{CoCeAlO}_x$ | 779.8, 794.8        | 781.5, 796.5     | 778.3, 793.3  |
| $\text{CoCeO}_x$   | 779.8, 794.8        | 781.5, 796.5     | 778.4, 793.4  |
| $\text{CoAlO}_x$   | 780.1, 795.1        | 781.8, 796.8     | 778.3, 793.3  |

**Table S5** The peak center of different Ce species ( $\text{Ce}^{3+}$ ,  $\text{Ce}^{4+}$ ) in XPS.

| Samples            | Binding Energy (eV)        |                                          |
|--------------------|----------------------------|------------------------------------------|
|                    | $\text{Ce}^{3+}$           | $\text{Ce}^{4+}$                         |
| $\text{CoCeAlO}_x$ | 903.9, 899.0, 885.4, 880.5 | 916.3, 907.3, 900.7, 897.8, 888.8, 882.2 |
| $\text{CoCeO}_x$   | 903.9, 899.3, 885.4, 880.8 | 916.3, 907.6, 900.7, 897.8, 889.1, 882.2 |

**Table S6** The elements and surface composition analyzed by the XPS data of the used catalysts

| Catalysts          | $\text{Co}^0/(\text{Co}^{3+}+\text{Co}^{2+}+\text{Co}^0)$ | $\text{Ce}^{3+}/(\text{Ce}^{3+}+\text{Ce}^{4+})$ |
|--------------------|-----------------------------------------------------------|--------------------------------------------------|
| $\text{CoCeAlO}_x$ | 19.1%                                                     | 34.5%                                            |
| $\text{CoAlO}_x$   | 22.1%                                                     | \                                                |
| $\text{CoCeO}_x$   | 16.0%                                                     | 27.5%                                            |
